# Supplementary material for: Reinforcement drives rapid allopatric speciation
Source: Springer Nature journal article supplement (doi:10.1038/nature04004), 2005-10-01
Supplement: 41586_2005_BFnature04004_MOESM2_ESM.pdf [file 41586_2005_BFnature04004_MOESM2_ESM.pdf]

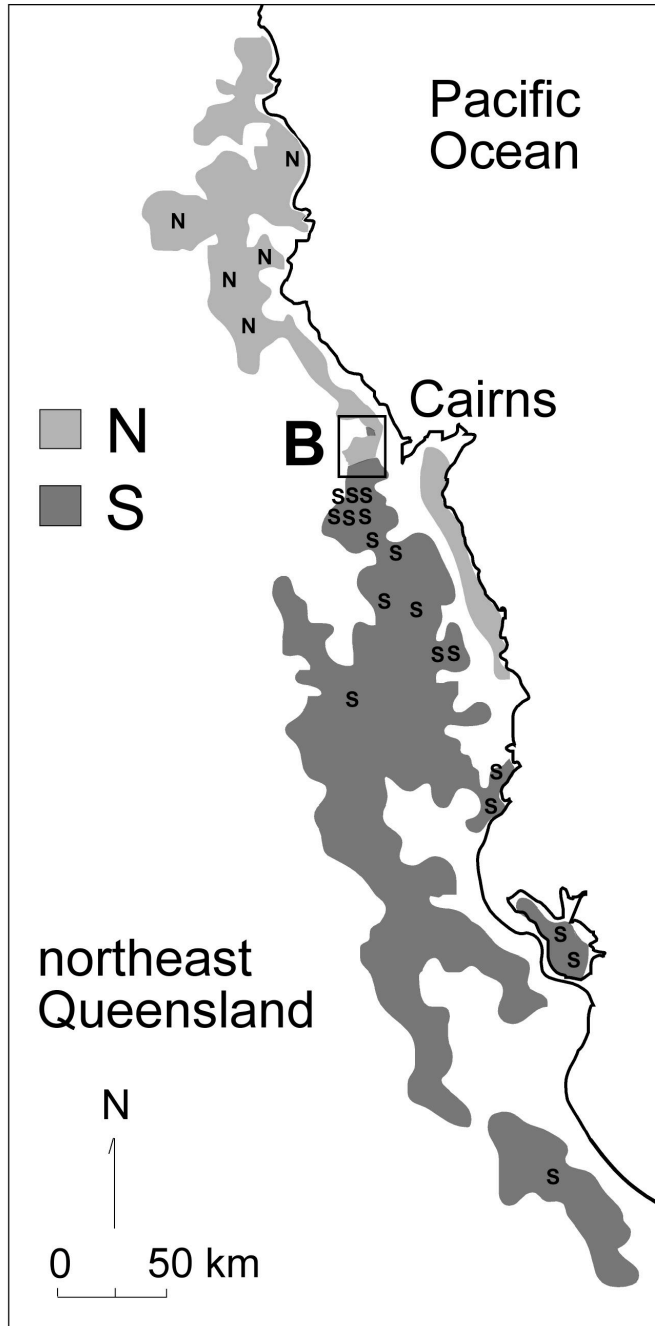

**Supplementary Fig. 1. Sampling sites outside the contact region, marked by lineage.** This figure provides detail for Fig. 1a. Lineage was determined by mtDNA as well as nuclear loci at some sites. N lineage sites are marked with an N and S lineage sites with an S. Sample size was 10-20 at most sites. The broad scale distribution of the two lineages was determined by Schneider *et al.* (ref. 1).
