# Supplementary material for: Reinforcement drives rapid allopatric speciation
Source: Springer Nature journal article supplement (doi:10.1038/nature04004), 2005-10-01
Supplement: 41586_2005_BFnature04004_MOESM3_ESM.pdf [file 41586_2005_BFnature04004_MOESM3_ESM.pdf]

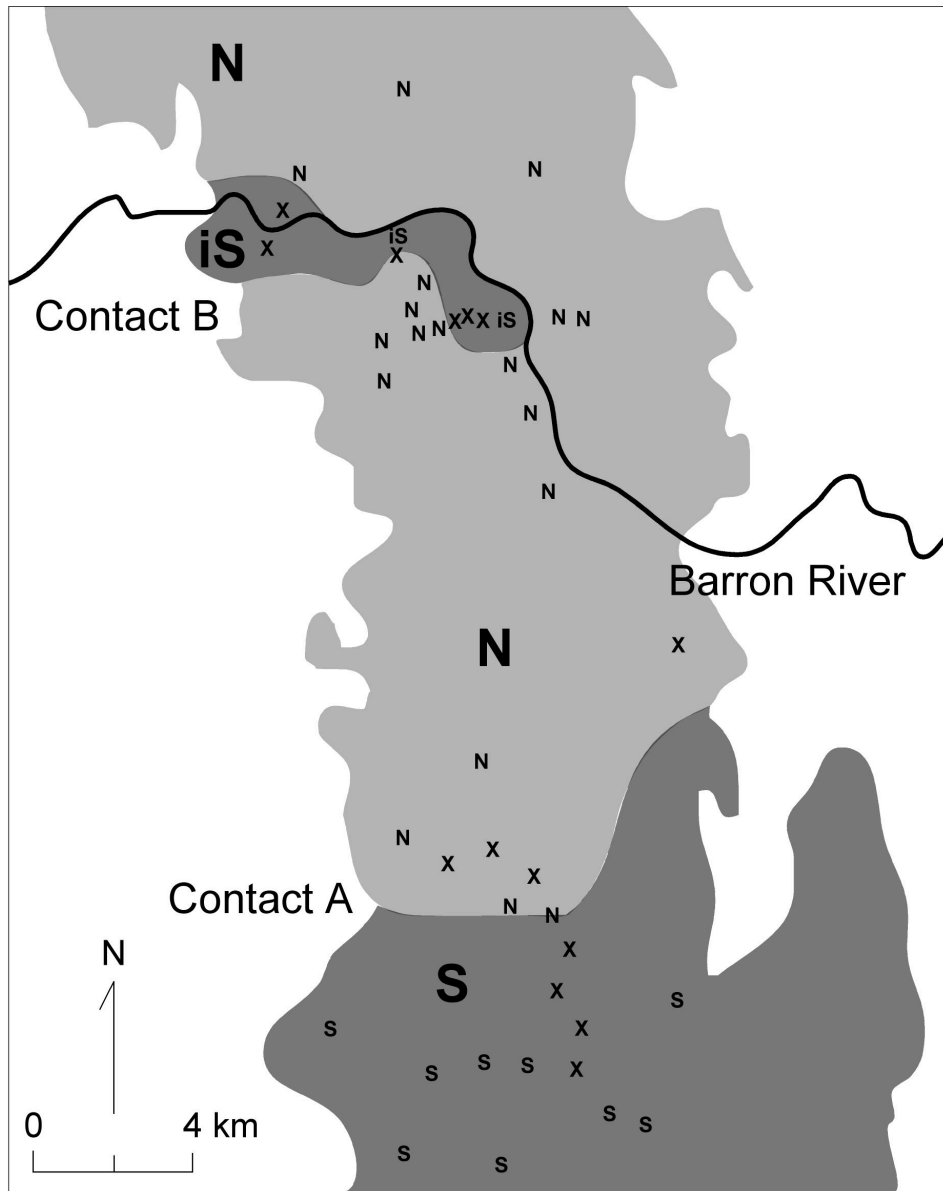

**Supplementary Fig. 2. The sampling sites through the contact region.** This figure provides detail for Fig. 1b. Lineage was determined by mtDNA and nuclear loci. An N represents a site where all samples were N lineage, an S or iS a site where all frogs were S or iS lineage, and an X a site where both lineages were present. Sample size was 10-20 at most sites.
